# Supplementary material for: Why equal treatment is not always equitable: the impact of existing ethnic health inequalities in cost-effectiveness modeling
Source: PubMed Central journal article supplement (PMC4047777; doi:10.1186/1478-7954-12-15), 2014-06-02
Supplement: 1478-7954-12-15-S1.pdf [file 1478-7954-12-15-S1.pdf]

## Appendix 1: Health system costs

Table 6 Average health system costs (\$NZ) for total New Zealand population, and health system costs for the last six months of life, by age and gender, 2011

| Age group (yrs) | Male                 |                       | Female               |                       |
|-----------------|----------------------|-----------------------|----------------------|-----------------------|
|                 | Average monthly cost | Last 6 months of life | Average monthly cost | Last 6 months of life |
| 0               | 132.58               | 1655.37               | 149.24               | 2004.90               |
| 1-4             | 115.14               | 1536.45               | 129.60               | 1860.86               |
| 5-9             | 86.70                | 1309.57               | 97.59                | 1586.08               |
| 10-14           | 71.53                | 1157.04               | 80.51                | 1401.35               |
| 15-19           | 64.05                | 1056.95               | 72.10                | 1280.12               |
| 20-24           | 61.70                | 995.68                | 69.45                | 1205.91               |
| 25-29           | 63.33                | 964.76                | 71.29                | 1168.46               |
| 30-34           | 68.64                | 959.01                | 77.26                | 1161.50               |
| 35-39           | 77.84                | 975.46                | 87.62                | 1181.43               |
| 40-44           | 91.50                | 1012.63               | 103.00               | 1226.45               |
| 45-49           | 110.48               | 1070.10               | 124.36               | 1296.05               |
| 50-54           | 135.77               | 1148.15               | 152.82               | 1390.58               |
| 55-59           | 168.23               | 1247.54               | 189.37               | 1510.96               |
| 60-64           | 208.28               | 1369.18               | 234.45               | 1658.28               |
| 65-69           | 255.28               | 1513.89               | 287.35               | 1833.55               |
| 70-74           | 306.91               | 1682.02               | 345.46               | 2037.17               |
| 75-79           | 358.61               | 1873.01               | 403.66               | 2268.49               |
| 80-84           | 403.51               | 2084.96               | 454.20               | 2525.20               |
| 85-89           | 433.21               | 2314.09               | 487.63               | 2802.71               |
| 90+             | 439.71               | 2554.23               | 494.95               | 3093.55               |
